# Supplementary material for: Subspecies-specific song preferences and diverged heterospecific discrimination in females of the bush-cricket Isophya kraussii (Orthoptera: Phaneropterinae)
Source: Oxford University Press journal article supplement (doi:10.1093/biolinnean/blx094), 2017-08-03
Supplement: blx094_suppl_Supplementary_Material.docx [file blx094_suppl_Supplementary_Material.docx]

**Supplementary material**

Figure S1. A schematic drawing showing the configuration of playback devices within the isolator box from above. S - Speaker, M - microphone, A - cage of the tested bush-cricket female; arrows show the direction of speaker and microphone.

Table S1. The results of playback experiments examining the response rate of females to consubspecific, heterosubspecific and heterospecific male songs in the two subspecies of *I. kraussii*.

Description of the variables shown in this table. Female specimen id. - serial numbers of the tested females (a factor with 32 levels); female's subspecies id. - a factor with 2 levels: *I. k. kraussii*, *I. k. moldavica*; male's taxonomic id. - the taxonomic identity of the male specimen from which the song stimulus was recorded (a factor with 3 levels: *I. k. kraussii*, *I. k. moldavica*, *I. camptoxypha*); stimulus - the identifier code of the playback stimuli each containing 30 syllables recorded from a given male specimen, and every stimulus recorded from different male specimens (a factor with 15 levels [5 stimuli per taxon]); male song type - a factor with 3 levels: consubspecific, heterosubspecific, heterospecific; stimulus series - the serial number of the stimulus series containing the 15 stimuli in a randomized order (a factor with 3 levels according to the 3 stimulus series); N of syllables answered - the number of syllables answered by the tested female with her response clicks (this number varies between 0-30, because each stimulus contained 30 syllables).
